# Supplementary material for: A high thermal stability ohmic contact for GaN-based devices
Source: Royal Society of Chemistry journal article supplement (doi:10.1039/d3na00491k), 2023-01-01
Supplement: d3na00491k1.pdf [file d3na00491k1.pdf]

## **Supporting Information**

### **High thermal stability Ohmic contact for GaN-based devices**

Chia-Yi Wu<sup>a</sup>, Tien-Sheng Chao<sup>a</sup>, Yi-Chia Chou<sup>b,\*</sup>

<sup>a</sup> Department of Electrophysics, National Yang Ming Chiao Tung University, Hsinchu  
300093, Taiwan

<sup>b</sup> Department of Materials Science and Engineering, National Taiwan University,  
Taipei 10617, Taiwan

\* Corresponding author.

*Email address:* [ycchou@ntu.edu.tw](mailto:ycchou@ntu.edu.tw) (Y. -C. Chou)

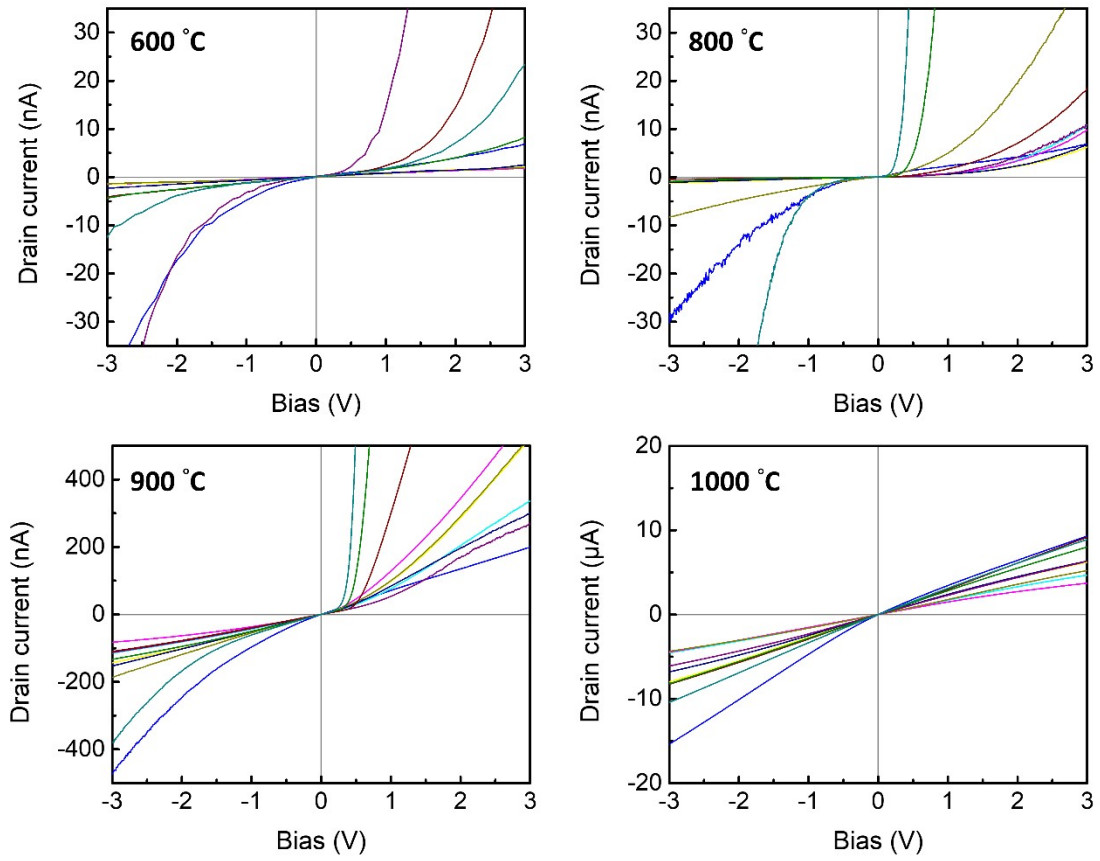

**Fig. S1** I-V characteristics of AlGaIn/GaN HEMTs using TiN as contact metal after lower temperature annealing treatments.
